# Supplementary material for: Fair surface modification with mixed alkanethiols on gold nanoparticles through minimal unfair ligand exchange
Source: Royal Society of Chemistry journal article supplement (doi:10.1039/d4na00270a), 2024-01-01
Supplement: d4na00270a1.pdf [file d4na00270a1.pdf]

## *Electronic Supplementary Information*

# Fair Surface Modification with Mixed Alkanethiols on Gold Nanoparticles through Minimal Unfair Ligand Exchange

*Kun Xiong,<sup>a</sup> Masaharu Nagayama,<sup>b</sup> Kuniharu Ijio,<sup>b</sup> Hideyuki Mitomo<sup>\*b</sup>*

*<sup>a</sup> Graduate School of Life Science, Hokkaido University, Sapporo 060-0810, Japan*

*<sup>b</sup> Research Institute for Electronic Science, Hokkaido University, Sapporo 001-0021, Japan.*

*E-mail: mitomo@es.hokudai.ac.jp*

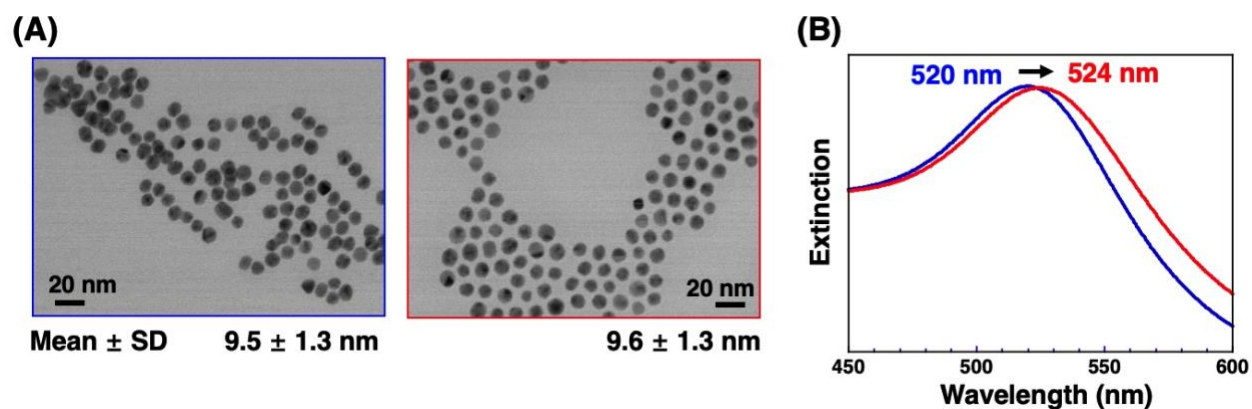

**Figure S1.** TEM images (A) and extinction spectra (B) of 10-nm AuNPs coated with citrate (blue) and OH-EG6 (red) as before and after reaction, respectively. The sizes in the TEM images indicate mean  $\pm$  SD ( $n = 150$  and  $340$ ). The numbers in the spectra indicate their peak wavelength.

**Table S1.** Hydrodynamic diameter and zeta-potential of AuNPs before and after surface modifications with C1-, C2-, and OH-EG6-C11-SH ligands.

| Surface modifier | Zeta-Potential (mv) | Size* <sup>1</sup> (nm) |
|------------------|---------------------|-------------------------|
| Citrate          | -27.1               | 10.6                    |
| C1-EG6-C11-SH    | -4.4                | 12.4                    |
| C2-EG6-C11-SH    | -3.7                | 14.8                    |
| OH-EG6-C11-SH    | -5.0                | 12.9                    |

\*<sup>1</sup> Size was determined as a main peak size in DLS size distribution by volume.

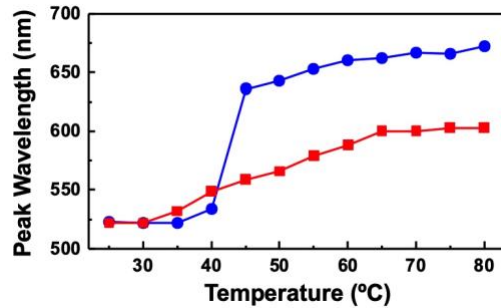

**Figure S2.** Extinction peak shifts of AuNPs@C2-EG6-C11-SH (blue) and AuNPs@pNIPAM-SH (red) upon heating. Thermo-responsive properties of AuNPs@pNIPAM-SH were measured in 20 mM NaCl aq.

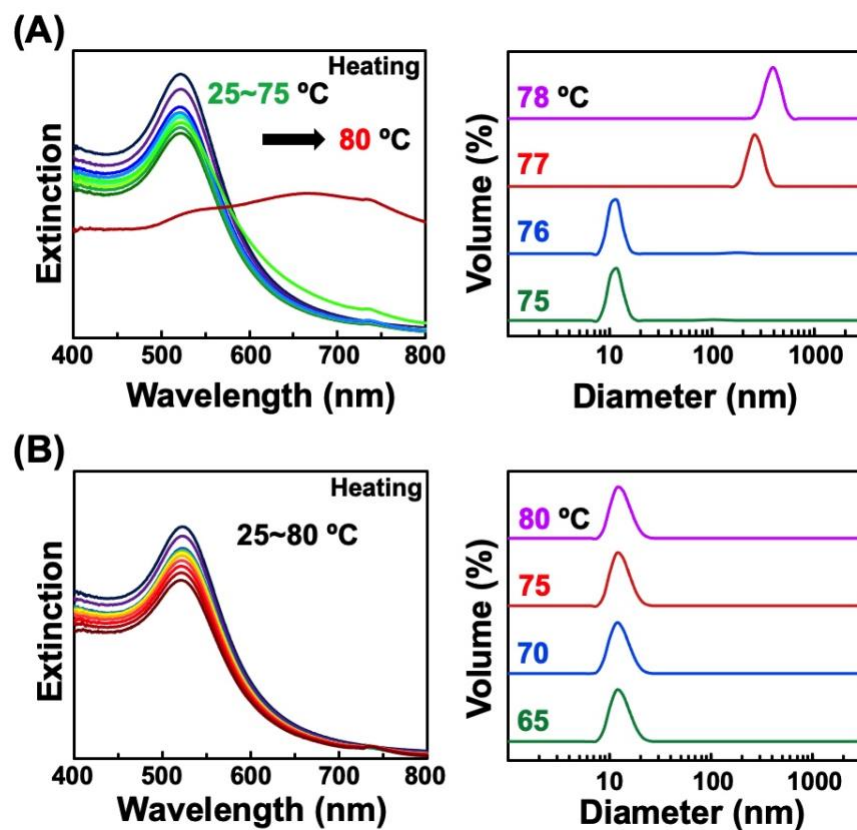

**Figure S3.** Thermo-responsive phenomena of AuNPs modified with (A) C1-EG6-C11-SH and (B) OH-EG6-C11-SH upon heating. Extinction spectra (left) and size distribution by DLS (right).

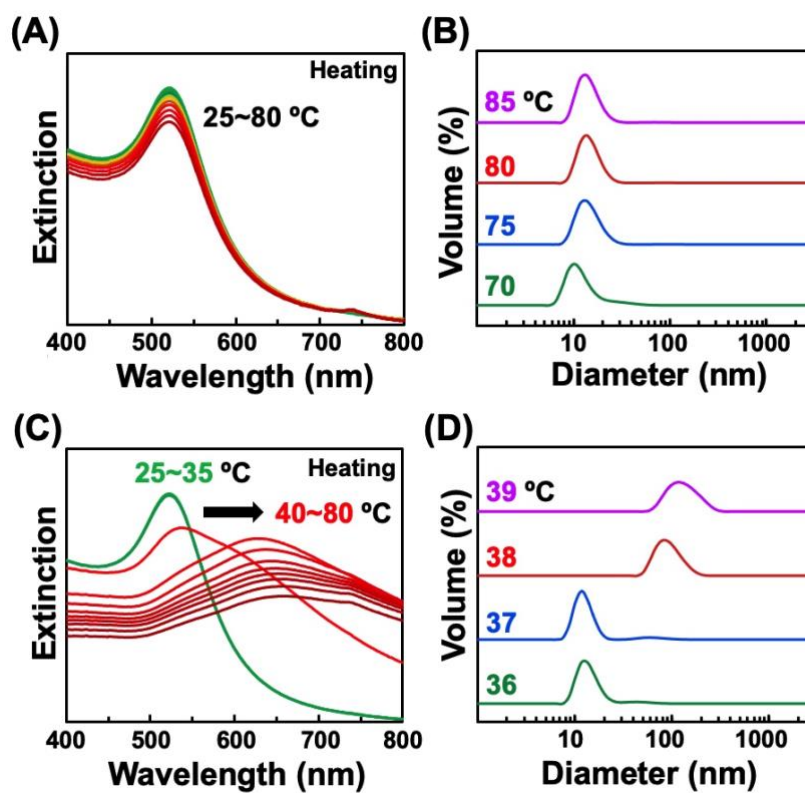

**Figure S4.** (A) Extinction spectra and (B) size distribution of AuNPs purified after measurements in Figure 2A in the absence of free alkane-thiols upon heating. (C) Extinction spectra and (D) Size distribution of AuNPs@C2-EG6-C11-SH upon heating in the presence of OH-EG6-C12.

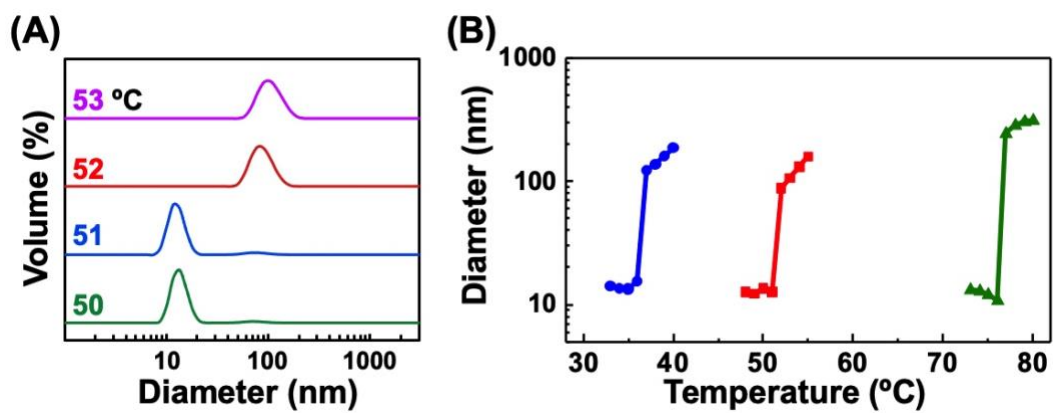

**Figure S5.** (A) Size distribution of C1-EG6-C11-SH-replaced AuNPs@C2-EG6-C11-SH determined by DLS and (B) comparison of thermo-responsive assembly temperatures of AuNPs@C2-EG6-C11-SH (blue), AuNPs@C2-EG6-C11-SH heated in the presence of C1-EG6-C11-SH at 85 °C for 0.5 h (red), and AuNPs@C1-EG6-C11-SH (green).

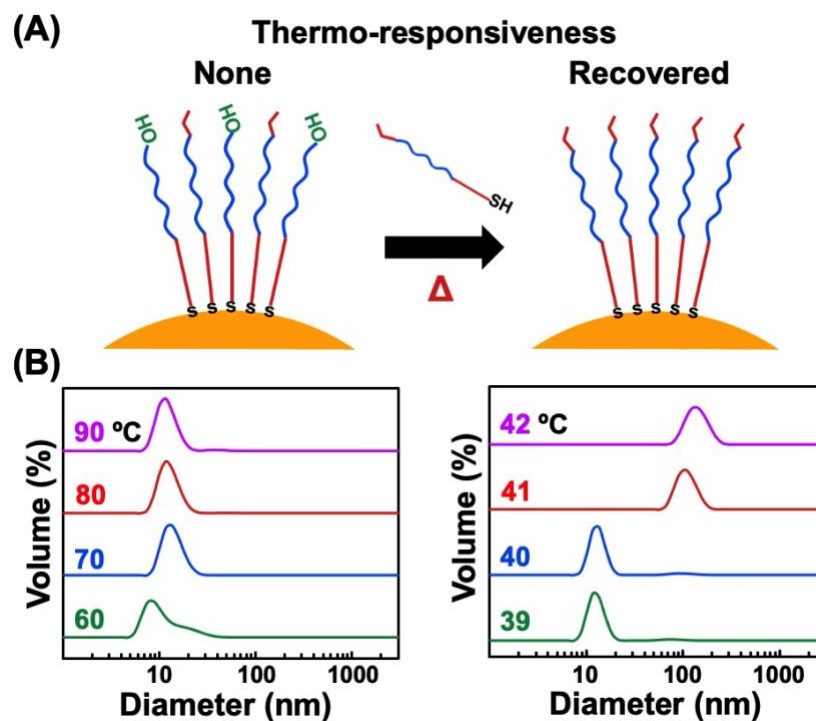

**Figure S6.** (A) Schematic illustration of the recovery of thermo-responsiveness by addition of C2-EG6-C11-SH as free ligands. (B) Size distribution of 10-nm AuNPs@C2-EG6-C11-SH reacted with OH-EG6-C11-SH after purification (left) and AuNPs further reacted with C2-EG6-C11-SH (right).

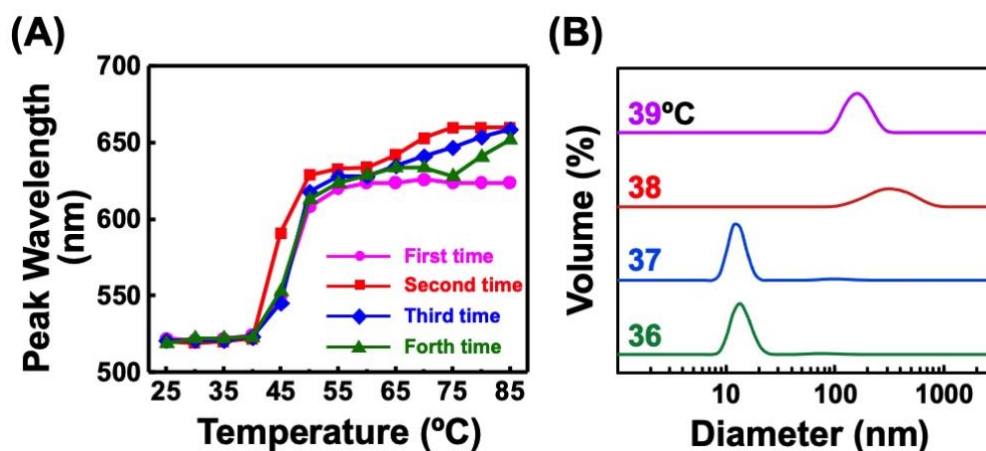

**Figure S7.** (A) Peak wavelength of 10-nm AuNPs@C2-EG6-C11-SH at each temperature over four cycles of heating. (B) Size distribution of the AuNPs after spectral measurement.

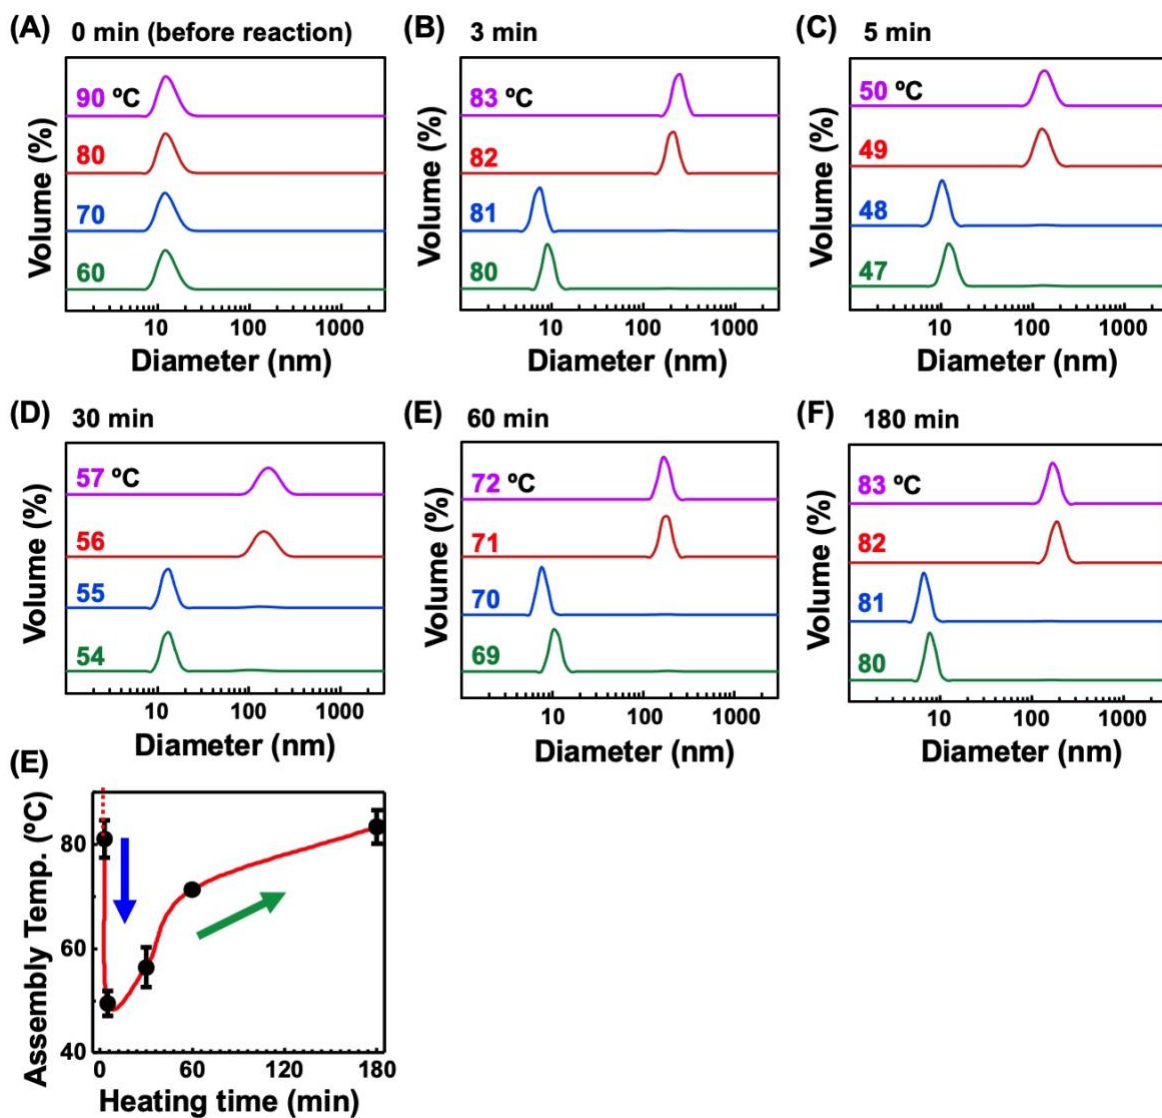

**Figure S8.** Reaction time-dependent changes in their thermo-responsive temperature of AuNPs@OH-EG6-C11-SH reacted with C2-EG6-C11-EG6 at 85°C. Size distribution at each reaction time: (A) before addition regarded as 0 minutes, (B) 3 min, (C) 5 min, (D) 30 min, (E) 60 min, and (F) 180 min. (G) Plot of assembly temperature at each time.

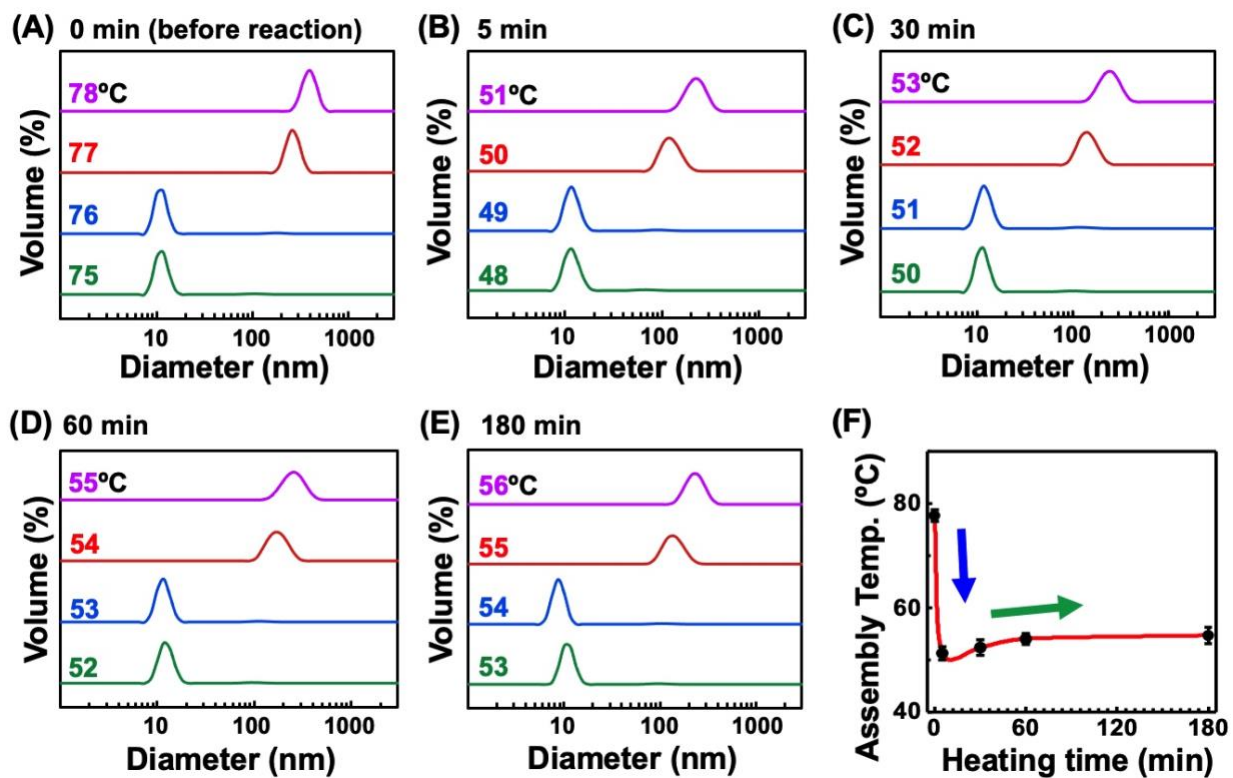

**Figure S9.** Reaction time-dependent changes in their thermo-responsive temperature of AuNPs@C1-EG6-C11-SH reacted with C2-EG6-C11-EG6 at 85°C. Size distribution at each reaction time: (A) before addition regarded as 0 minutes, (B) 5 min, (C) 30 min, (D) 60 min, and (E) 180 min. (F) Plot of assembly temperature at each time.



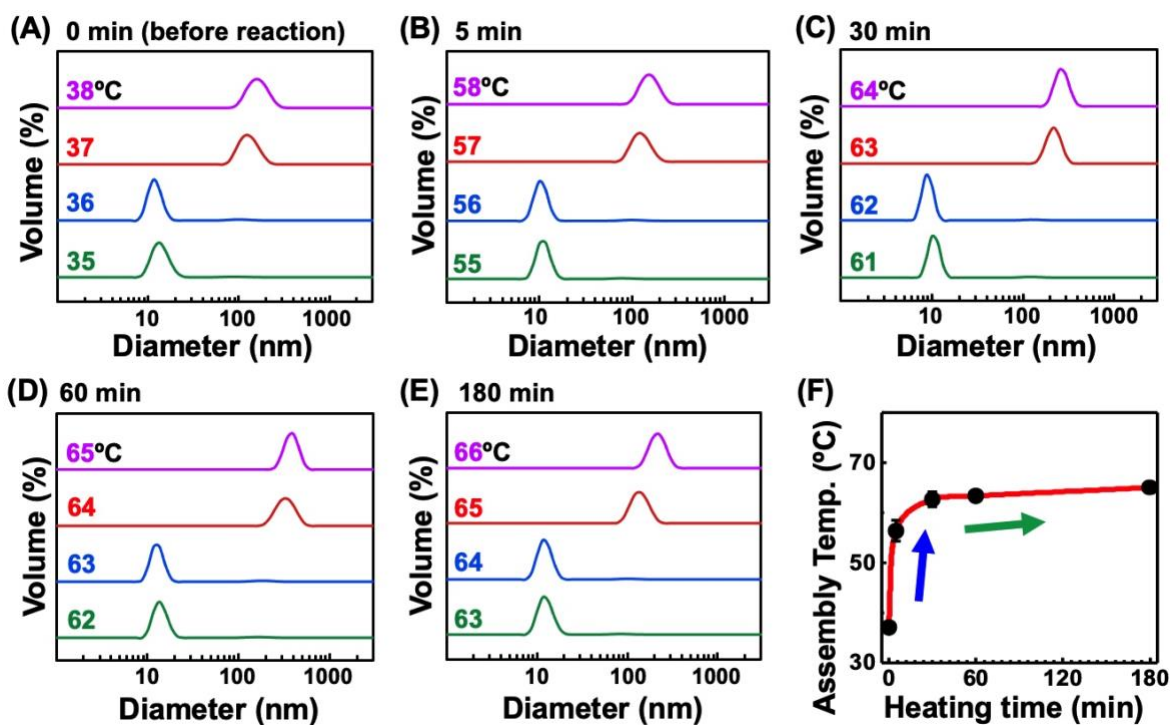

**Figure S10.** Reaction time-dependent changes in their thermo-responsive temperature of AuNPs@C2-EG6-C11-SH reacted with C1-EG6-C11-EG6 at 85°C. Size distribution at each reaction time: (A) before addition regarded as 0 minutes, (B) 5 min, (C) 30 min, (D) 60 min, and (E) 180 min. (F) Plot of assembly temperature at each time.

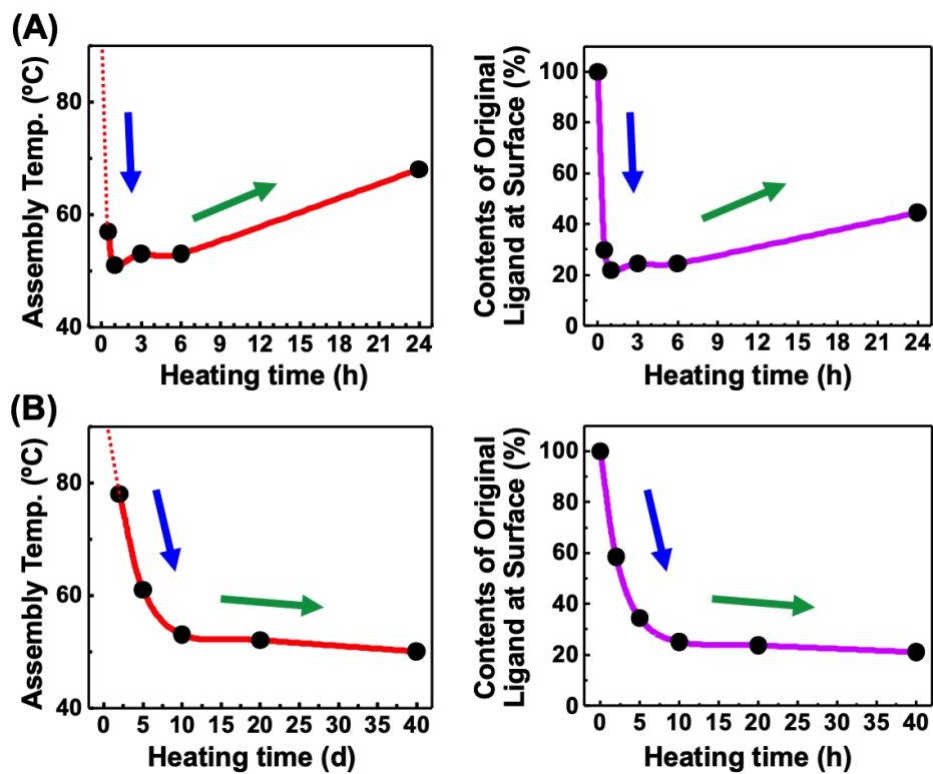

**Figure S11.** Assembly temperature changes (left) and ligand content changes at the AuNP surface (right) in the time-course experiment for 10-nm AuNPs@OH-EG6-C11-SH reacted with C2-EG6-C11-SH at (A) 55°C and (B) 25°C.

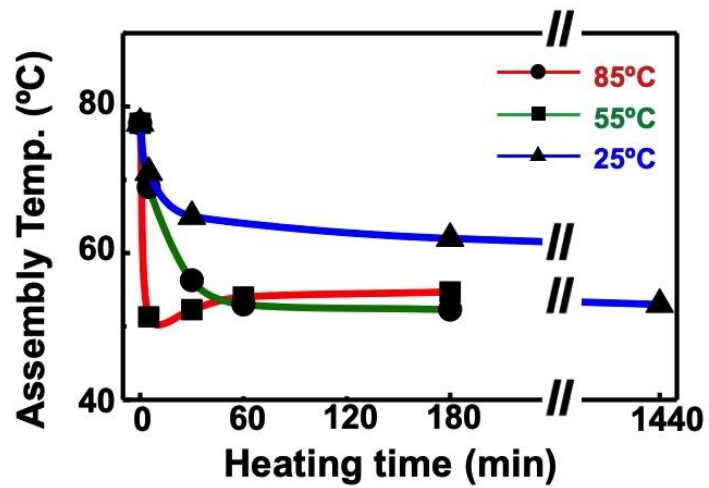

**Figure S12.** Assembly temperature in the time-course experiment for 10-nm AuNPs@C1-EG6-C11-SH by addition of C2-EG6-C11-SH at the ligand exchange temperature of 85°C, 55°C, and 25°C.

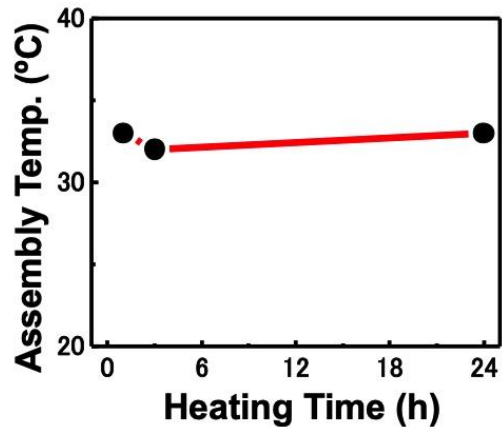

**Figure S13.** Thermo-responsive size distribution of (A) AuNPs@C2-EG6-C11-SH incubated for various times at 25°C.

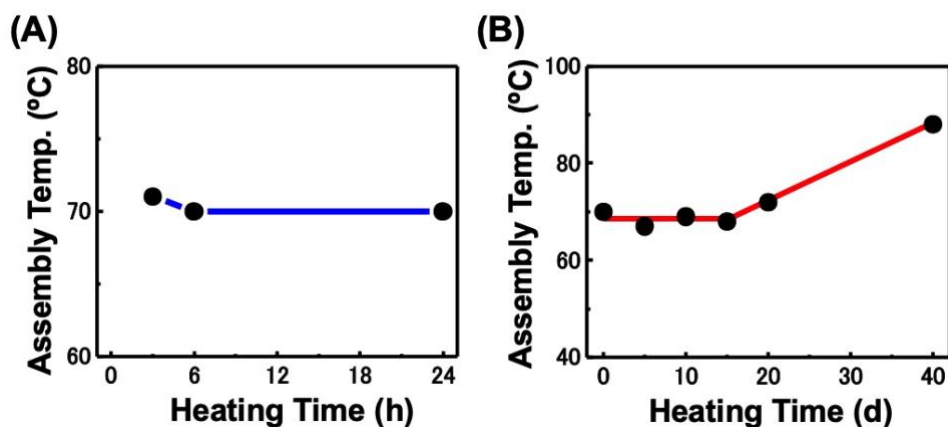

**Figure S14.** Assembly temperature changes in the time-course experiment for 10-nm AuNPs@ (50% OH-EG6-C11-SH + 50% C2-EG6-C11-SH) in the presence of a mixture of C2-EG6-C11-SH and OH-EG6-C11-SH at the same concentration at 25°C (A) within 24 hours and (B) over 24 hours.

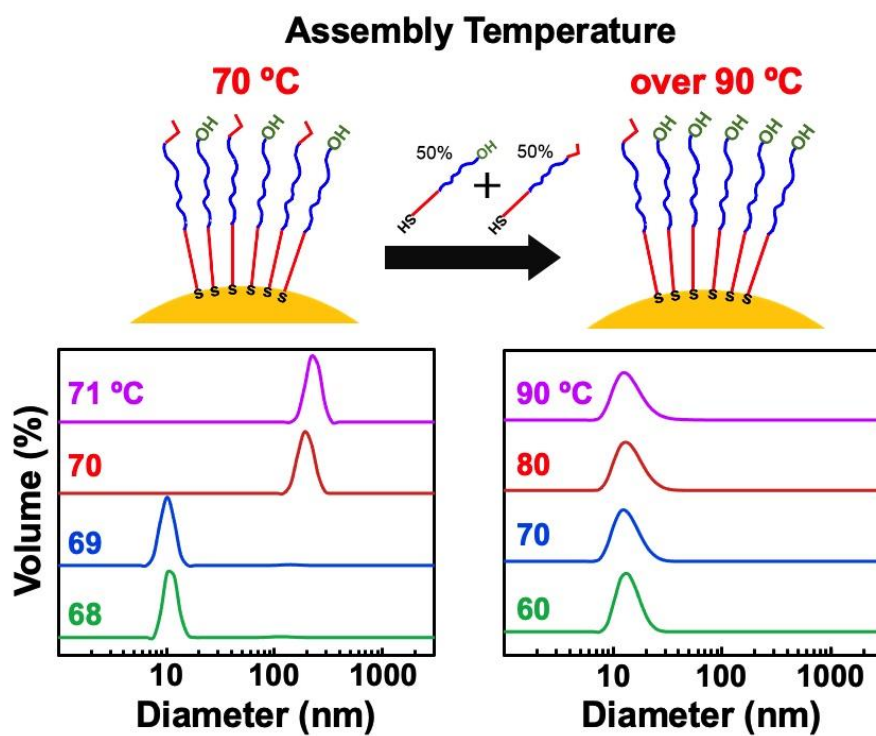

**Figure S15.** Assembly temperature change in 10-nm AuNPs modified with the mixed ligands of 50% C2-EG6-C11-SH + 50% OH-EG6-C11-SH upon heating at 85°C for 3 hours in the presence of the identical free ligands.

**Table S2.** Assembly temperature of 10-nm AuNPs modified with the mixed ligands at various ratios: (A) C1-EG6-C11-SH and C2-EG6-C11-SH and (B) OH-EG6-C11-SH and C2-EG6-C11-SH.

**(A)**

|                          |                |                |                |                |                |
|--------------------------|----------------|----------------|----------------|----------------|----------------|
| C2-EG6-C11-SH (%)        | 100            | 75             | 50             | 25             | 0              |
| C1-EG6-C11-SH (%)        | 0              | 25             | 50             | 75             | 100            |
| $T_A$ (°C) <sup>*1</sup> | $37.0 \pm 1.0$ | $45.7 \pm 1.2$ | $56.0 \pm 1.7$ | $66.0 \pm 1.0$ | $77.7 \pm 1.2$ |

**(B)**

|                          |                |                |                |                |                |
|--------------------------|----------------|----------------|----------------|----------------|----------------|
| C2-EG6-C11-SH (%)        | 90             | 80             | 70             | 60             | 50             |
| OH-EG6-C11-SH (%)        | 10             | 20             | 30             | 40             | 50             |
| $T_A$ (°C) <sup>*1</sup> | $40.7 \pm 0.6$ | $47.0 \pm 1.0$ | $55.3 \pm 2.1$ | $63.7 \pm 2.5$ | $74.8 \pm 2.6$ |

<sup>\*1</sup>  $T_A$  was determined from three independent DLS analyses.
